# Supplementary material for: A linear and circular dual-conformation noncoding RNA involves in oxidative stress tolerance of Bacillus altitudinis
Source: Research Square preprint supplement (doi:10.21203/rs.3.rs-2664145/v1), 2023-03-21
Supplement: Supplementary file 1 [file ed81de5776fa36d3bc9dd6a7.xlsx]

## Sheet: Fig.1d
sample	primer	Sanger sequencing
TTS1st	M13-47	CGGCAGCTGGACGCACCCATTCATCACGATAGCGCTTTTTGAAAGCACTTTCTGGTTTGGATGCGTAACAATGGCGTGATGAAGCTCCCCATGATCCCCTCATCTTTCACACACCAAATCGTCGACCTGCAGGCATGCAAGCTTGGCGTAATCATGGTCATAGCTGTTTCCTGA
TTS2nd	M13-47	CCACAGTGGACGCACCCAATTCATCACGATAGCGCTTTTTGAAGCACTTTCAAAAAAGCCTACCCCTAGGCTTTTTTTTATGTATGGTTTGGATGCGTAACAATGGCGTGATGAAGAATCTCTAGAGGATCCCCGGGTACCGAGCTCGAATTCACTGGCCGTCGTTTTAC

## Sheet: Fig.2d
sample	primer
S1	M13-47	GGCATAGTAGTGATTCGAGCTCGGTACCCGGGGATCCTCTAGAGATTCTTCATCACGCCATTGTTACGCATCCAAACCATGAAAGTGCTTTCAAAAAGCGCTATCGTGATGAATTGGGTGCGTTCCACTTTGGATTTACGGCGATGAGCCAAATGAGAGAGAAGAATCGTCGACCTGCAGGCATGCAAGCTTGGCGTAATCATGGTCAAGCCCTGTTTCCTGA
S2-1	M13-47	GGCATCGTAGTGATTCGAGCTCGGTACCCGGGGATCCTCTAGAGATTCTTCTCTCTCATTTGGCTCATCGCCGTAAATCCAAAGTGGAACGCACCCAATTATGGTTTGGATGCGTAACAATGGCGTGATGAAGAATCGTCGACCTGCAGGCATGCAAGCTTGGCGTAATCATGGTCAAGCTGTTTCCTGA
S2-2	M13-47	GGCATCGCAGTGATTCGAGCTCGGTACCCGGGGATCCTCTAGAGATTCATCCAAACCATGATGAATTGGGTGCGTTCCACTTTGGATTTACGGCGATGAGCCAAATGAGAGAGAAGCGCTTCTGGGAGAAAGGCAAAGCATAAGGGGATATGATATAAGCAATGCTTTGGTGTGTGAAAGATGAGGGGATCATGGGGAGCTTCATCACGCCATTGTTACGCATCCAAACCATATGAATTGGGTGCGTTCCACTTTGGATTTACGGCGATGAGCCAAATGAGAGAGAAGAATCGTCGACCTGCAGGCATGCAAGCTTGGCGTAATCATGGTCAACTTGGTTTTCCTGA
S2-3	M13-47	GGCTTAGTAGTGATTCGAGCTCGGTACCCGGGGATCCTCTAGAGATTCGTAAATCCAAAGTGGAACGCACCCAATTCATCAATGGTTTGGATGCGTAACAATGGCGTGATGAAGCTCCCCATGATCCCCTCATCTTTCACACGCCAAAGCATTGCTTATATCATATCCCCTTATGCTTTGCTTTTCTCCCAGAAGCACTTCTCTCTCATTTGGCTCATCGCCGTAAATCCAAAGTGGAACGCACCCAATTCATCATGGTTTGGATGCGTAACAATGGCGTGATGAAGCTCCCCATGATCCCCTCATCTTTCACACACCAAAGCATTGCTTATATCATATCCCCTTATGCTTTGCTTTTCTCCCAGAAGCGCTTCTCTCTCATTTGGCTCATCGCCGTAA…

## Sheet: Fig.4d
Independent experiments n=3
Graphs plotted in GraphPad Prism 8.3 software
Statistical significance was calculated with a two-tailed unpaired t-test using GraphPad Prism 8.3 software and p value are indicated.
		fluorescence intensity
	htrA::gfp	DucS-htrA::gfp	DucSMC-htrA::gfp
Exp.1	238497	373698	440352
Exp.2	248069	411838	473756
Exp.3	235060	349669	466247
Mean	240542	378402	460118
SD	6741.39	31350.3	17525.2

## Sheet: Fig.4e
Independent experiments n=3
Graphs plotted in GraphPad Prism 8.3 software
Statistical significance was calculated with a two-tailed unpaired t-test using GraphPad Prism 8.3 software and p value are indicated.
			optical density
	WT_pEV	ΔducS_pEV	ΔhtrA_pEV	ΔducS_pDucS	ΔducS_pDucSMc
Exp.1	2.235	1.188	1.836	2.112	1.983
Exp.2	2.178	1.191	1.671	2.157	2.184
Exp.3	2.178	1.173	1.8	2.07	2.235
Mean	2.197	1.184	1.769	2.113	2.134
SD	0.032909	0.00964365	0.0867583	0.0435086	0.133233

## Sheet: Fig.5a
strain	Number of circular candidate in ORF	Number of circular candidate in non-coding RNAs	Number of circular candidate in unannotated RNA
gram-positive bacteria
Bacillus subtilis	44	6	0
Bacillus velezensis	5	0	0
Bacillus safensis	9	2	0
Bacillus paralicheniformis	15	4	1
Bacillus glycinifermentans	2	0	0
Bacillus altitudinis	42	3	4
Bacillus thuringiensis	30	4	1
Bacillus halodurans	5	3	0
Bacillus licheniformis	5	4	1
Listeria innocua	9	2	0
Staphylococcus aureus	37	0	3
Streptococcus pyogenes	10	1	2
Streptococcus pneumoniae	17	1	2
clostridium acetobutylicum	4	0	0
Streptomyces coelicolor	7	1	5
Mycoplasma tuberculosis	21	1	2
Corynebacterium glutamicum	17	2	4
gram-negative bacteria
pseudomonas fluorescens	16	2	1
Pseudomonas aeruginosa	4	2	2
pseudomonas syringae	0	1	2
microcystis aeruginosa	1	1	4
acidithiobacillus ferrooxidans	12	1	1
bradyrhizobium japonicum	65	1	3
Helicobacter pylori	53	2	3
salmonella enterica	19	2	0
Escherichia coli	24	4	0
shigella flexneri	16	1	1
vibrio anguillarum	6	1	5
vibrio cholerae	5	2	3
neisseria meningitidis	22	2	1

## Sheet: Fig.5b
Number of the circular candidates and reads supporting RNA circularization in B. altitudinis SCU11 transcriptome data downloaded from NCBI
Time (h)	Number of circular candidates
2	55
12	69
24	49
36	72
48	72
Number of permuted reads for 4 circular candadates.
Time (h)	SRP	DucS	Unknown-RNA1	EQK04_RS04100
2	597	391	24	0
12	1900	1871	223	0
24	2909	1353	604	0
36	1954	2734	540	121
48	942	2002	202	1056

## Sheet: Fig.5c
Fig. 5c RT-PCR of circular RNA candidates
			B. altitudinis SCU11										B. paralicheniformis

## Sheet: Fig.S1
Homologous sequences of DucS aligned by blastn
>Bacillus altitudinis strain SCU11
TGTCGAAGCTCGTAAATTCTGCGATAATACTTATTGAAAGTGCTTTCAAAAAGCGCTATCGTGATGAATTGGGTGCGTTCCACTTTGGATTTACGGCGATGAGCCAAATGAGAGAGAAGCGCTTCTGGGAGAAAAGCAAAGCATAAGGGGATATGATATAAGCAATGCTTTGGTGTGTGAAAGATGAGGGGATCATGGGGAGCTTCATCACGCCATTGTTACGCATCCAAACCATACATAAAAAAAAGCCTAGGGGTAGGCTTTTTT
>Bacillus sp. WP8
TGTCGAAGCACATAAATTCTGCGATAATACTTATATTGAAAGTGCTTTCAAAAAGGCGCTCTCAAGGGACAATTGGGTGCGTTTCACTTGGGATTTAAGGCAGTGAGCCAAACGAGAGAGAAGCGCTTCTGGGAGAAACGCAAAGCATAAGGGGATCTGATATAAGCAATGCTTTGGTGTGTGAAAGATAAGGGGATCATGGGGAGCTTCATCACTCCATTGTAACGCATCCAAACCATACATAAAAAAAGCCTAGGGGTAGGCTTTTTT
>Bacillus cellulasensis strain ku-bf1
TGTCGAAGCTCGTAAATTCTGCGATAATACTTATTGAAAGTGCTTTCAAAAAAGCGCTATCGTGATGAATTGGGTGCGTTCCACTTTGGATTTACGGCGATGAGCCAAATGAGAGAGAAGCGCTTCTGGGAGAAAAGCAAAGCATAAGGGGATATGATATAAGCAATGCTTTGGTGTGTGAAAGATGAGGGGATCATGGGGAGCTTCATCACGCCATTGTTACGCATCCAAACCATACATAAAAAAAAGCCTAGGGGTAGGCTTTTTT
>Bacillus safensis strain KCTC
TGTCGAAGCACATAAATTCTGCGATAATACTTATATTGAAAGTGCTTTCAAAAAGGCGCTCTCAAGGGACAATTGGGTGCGTTTCACTTGGGATTTATGGCGTTGAGCCAAACGAGAGAGAAGCGCTTCTGGGAGAAACGCAAAGCATCATAAGGGGATCTGATATAAGCAATGCTTTGGTGTGTAAATGATAAGGGGATCATGGGGAGCTTCATCACTCCATTGTAACGCATCCAAACCATACATAAAAAAAAGCCTAGGGGTAGGCTTTTTT
>Bacillus pumilus strain PDSLzg-1
TGTCGAAGCTCATAAATTCTGCGATAATACTTATATTGAAAGTGCTTTCAAATGAGCGCTCTCATGGGACAATTGGGTGCGTTTCACTTGGGATTTAAGGCGATTAGCCAAACGAGAGAGAAGCGCTTCTGGGAGAAACGCAAAGCATAAGGGGATCTGATATAAGCAATGCTTTGGTGTGTGAAAGATAAGGGGATCATGGGGAGCTTCATCACCTCATTGTGACGCATCCAAACCATACATAAAAAAAAGCCTAGGGGTAGGCTTTTTT
>Bacillus pummilus strain NCTC10337
TGTCGAAGCTCATAAATTTTGCGATAATACTTATATTGAAAGTGCTTTCAAATGAGCGCTCTCATGGGACAATTGGGTGCGTTTCACTTGGGATTTATGGCGATTAGCCAAACGAGAGAGAAGCGCTTCTGGGAGAAACACAAAGCATAAGGGGATCTGATATAAGCAATGCTTTGGTGTGTGAATGATAAGGGGATCATGGGGAGCTTCATCACCTCATTGTGACGCATCCAAACCATACATAAAAAAAAGCCTAGGGGTAGGCTTTTTT
>Bacillus altitudinis strain P-10
TGTCGAAGCTCGTAAATTCTGCGATAATACTTATTGAAAGTGCTTTCAAAAAGCGCTATCGTGATGAATTGGGTGCGTTCCACTTTGGATTTACGGCGATGAGCCAAATGAGAGAGAAGCGCTTCTGGGAGAAAAGCAAAGCATAAGGGGATATGATATAAGCAATGCTTTGGTGTGTGAAAGATGAGGGGATCATGGGGAGCTTCATCACGCCATTGTTACGCATCCAAACCATACATAAAAAAAAGCCTAGGGGTAGGCTTTTTT
>Bacillus pumilus strain B6033
TGTCGAAGCTCGTAAATTCTGCGATAATACTTATTGAAAGTGCTTTCAAAAAGCGCTATCGTGATGAATTGGGTGCGTTCCACTTTGGATTTACGGCGATGAGCCAAATGAGAGAGAAGCGCTTCTGGGAGAAAAGCAAAGCATAAGGGGATATGATATAAGCAATGCTTTGGTGTGTGAAAGATGAGGGGATCATGGGGAGCTTCATCACGCCATTGTTACGCATCCAAACCATACATAAAAAAAAGCCTAGGGGTAGGCTTTTTT
>Bacillus pumilus strain SH-B11
TGTCGAAGCTCGTAAATTCTGCGATAATACTTATTGAAAGTGCTTTCAAAAAGCGCTATCGTGATGAATTGGGTGCGTTCCACTTTGGATTTACGGCGATGAGCCAAATGAGAGAGAAGCGCTTCTGGGAGAAAAGCAAAGCATAAGGGGATATGATATAAGCAATGCTTTGGTGTGTGAAAGATGAGGGGATCATGGGGAGCTTCATCACGCCATTGTTACGCATCCAAACCATACATAAAAAAAAGCCTAGGGGTAGGCTTTTTT
>Bacillus altitudinis strain GLB197
TGTCGAAGCTCGTAAATTCTGCGATAATACTTATTGAAAGTGCTTTCAAAAAGCGCTATCGTGATGAATTGGGTGCGTTCCACTTTGGATTTACGACGATGAGTCAAATGAGAGAGAAGCGCTTCTGGGAGAAAAGCAAAGCATAAGGGGATATGATATAAGCAATGCTTTGGTGTGTGAAAGATGAGGGGATCATGGGGAGCTTCATCACGCCATTGTTACGCATCCAAACCATACATAAAAAAAAGCCTAGGGGTAGGCTTTTTT
>Bacillus safensis strain U41
TGTCGAAGCACATAAATTCTGCGATAATACTTGTATTGAAAGTGCTTTCAAAAAGGCGCTATCAAGGGACAATTGGGTGCGTTTCACTTGGGATTTATGGCAGTGAGCCAAACGAGAGAGAAGCGCTTCTGGGAGAAACGCAAAGCATCATAAGGGGATCTGATATAAGCAATGCTTTGGTGTGTGAAAGATAAGGGGATCATGGGGAGCTTCATCACTCCATTGTAACGCATCCAAACCATACATAAAAAAAAGCCTAGGGGTAGGCTTTTTT
>Bacillus altitudinis strain GR-8
TGTCGAAGCTCGTAAATTCTGCGATAATACTTATTGAAAGTGCTTTCAAAAAGCGCTATCGTGATGAATTGGGTGCGTTCCACTTTGGATTTACGACGATGAGTCAAATGAGAGAGAAGCGCTTCTGGGAGAAAAGCAAAGCATAAGGGGATATGATATAAGCAATGCTTTGGTGTGTGAAAGATGAGGGGATCATGGGGAGCTTCATCACGCCATTGTTACGCATCCAAACCATACATAAAAAAAAGCCTAGGGGTAGGCTTTTTT
>Bacillus xiamenensis strain VV3
TGTCGAAGCTCATAAATTCTGCGATAATACTTATTGAAAGTGCTTTCAAAAAAGTACTCTCGTGATGAATTGGGTGCGTTTCACTTGGGCTTTATGGCGATGAGTCAAATGAGAGAGAAGCGCTTCTGGGAGAAAAGCAAAGCATAAGGGGATCTGATATAAGCAATGCTTTGGTGTGTAAGATTAGGGGATAATGGGGAGCTTCATCACTCCATTGTTACGCATCCAAACCGACATAAAAAAAAGCCTAGGGGTAGGCTTTTTT
>Bacillus altitudinis strain SGAir0031
TGTCGAAGCTCGTAAATTCTGCGATAATACTTATTGAAAGTGCTTTCAAAAAGCGCTATCGTGATGAATTGGGTGCGTTCCACTTTGGATTTACGGCGATGAGCCAAATGAGAGAGAAGCGCTTCTGGGAGAAAAGCAAAGCATAAGGGGATATGATATAAGCAATGCTTTGGTGTGTGAAAGATGAGGGGATCATGGGGAGCTTCATCACGCCATTGTTACGCATCCAAACCATACATAAAAAAAAGCCTAGGGGTAGGCTTTTTT
>Bacillus altitudinis strain TM2 DNA
TGTCGAAGCTCGTAAATTCTGCGATAATACTTATTGAAAGTGCTTTCAAAAAGCGCTATCGTGATGAATTGGGTGCGTTCCACTTTGGATTTACGACGATGAGTCAAATGAGAGAGAAGCGCTTCTGGGAGAAAAGCAAAGCATAAGGGGATATGATATAAGCAATGCTTTGGTGTGTGAAAGATGAGGGGATCATGGGGAGCTTCATCACGCCATTGTTACGCATCCAAACCATACATAAAAAAAAGCCTAGGGGTAGGCTTTTTT
>Bacillus safensis strain U14-5
TGTCGAAGCACATAAATTCTGCGATAATACTTATATTGAAAGTGCTTTCAAAAAGGCGCTCTCAAGGGACAATTGGGTGCGTTTCACTTGGGATTTATGGCGGTGAGCCAAACGAGAGAGAAGCGCTTCTGGGAGAAACGCAAAGCATCATAAGGGGATCTGATATAAGCAATGCTTTGGTGTGTAAATGATAAGGGGATCATGGGGAGCTTCATCACTCCATTGTAACGCATCCAAACCATACATAAAAAAAGCCTAGGGGTAGGCTTTTTT
>Bacillus safensis strain BRM1
TGTCGAAGCACATAAATTCTGCGATAATACTTATATTGAAAGTGCTTTCAAAAAGCGCTCTCAAGGGACAATTGGGTGCGTTTCACTTGGGATTTATGGCGTGAGCCAAACGAGAGAGAAGCGCTTCTGGGAGAAACGCAAAGCATCATAAGGGGATCTGATATAAGCAATGCTTTGGTGTGTAAATGATAAGGGGATCATGGGGAGCTTCATCACTCCATTGTAACGCATCCAAACCATACATAAAAAAAAGCCTAGGGGTAGGCTTTTTT
>Bacillus cellulasensis strain NJ-V
TGTCGAAGCTCGTAAATTCTGCGATAATACTTATTGAAAGTGCTTTCAAAAAGCGCTATCGTGATGAATTGGGTGCGTTCCACTTTGGATTTACGACGATGAGTCAAATGAGAGAGAAGCGCTTCTGGGAGAAAAGCAAAGCATAAGGGGATATGATATAAGCAATGCTTTGGTGTGTGAAAGATGAGGGGATCATGGGGAGCTTCATCACGCCATTGTTACGCATCCAAACCATACATAAAAAAAAGCCTAGGGGTAGGCTTTTTT
>Bacillus pumilus strain AM24
TGTCGAAGCTCTAAATTCTGCGATAATACTTATTGAAAGTGCTTTCAAAAAGCGCTATCGTGATGAATTGGGTGCGTTCCACTTTGGATTTACGACGATGAGTCAAATGAGAGAGAAGCGCTTCTGGGAGAAAAGCAAAGCATAAGGGGATATGATATAAGCAATGCTTTGGTGTGTGAAAGATGAGGGGATCATGGTGATCTTCATCA
> Bacillus pumilus strain C4
TGTCGAAGCTCGTAAATTCTGCGATAATACTTATTGAAAGTGCTTTCAAAAAGCGCTATCGTGATGAATTGGGTGCGTTCCACTTTGGATTTACGGCGATGAGCCAAATGAGAGAGAAGCGCTTCTGGGAGAAAAGCAAAGCATAAGGGGATATGATATAAGCAATGCTTTGGTGTGTGAAAGATGAGGGGATCATGGGGAGCTTCATCACGCCATTGTTACGCATCCAAACCATACATAAAAAAAAGCCTAGGGGTAGGCTTTTTT
>Bacillus pumilus strain SH-B9
TGTCGAAGCTCATAAATTCTGCGATAATACTTATATTGAAAGTGCTTTCAAATAAGCGCTCTCATGGGACAATTGGGTGCGTTTCACTTGGGATTTAAGGCGATTAGCCAAACGAGAGAGAAGCGCTTCTGGGAGAAACGCAAAGCATAAGGGGATCTGATATAAGCAATGCTTTGGTGTGTGAAAGATAAGGGGATCATGGGGAGCTTCATCACCTCATTGTGACGCATCCAAACCATACATAAAAAAAAGCCTAGGGGTAGGCTTTTTT
>Bacillus pumilus strain SAFR-032
TGTCGAAGCTCATAAATTCTGCGATAATACTTATATTGAAAGTGCTTTCAACAAGCGCTCTCATGGGACAATTGGGTGCGTTTCACTTGGGATTTAAGGCGATTAGCCAAACGAGAGAAGCGCTTCTGGGAGAAACGCAAAGCATAAGGGGATCTGATATAAGCAATGCTTTGGTGTGTGAAAGATAAGGGGATCATGGGGAGCTTCATCACCTCATTGTGACGCATCCAAACCATACATAAAAAAAAGCCTAGGGGTAGGCTTTTTT
>Bacillus altitudinis strain W3
TGTCGAAGCTCGTAAATTCTGCGATAATACTTATTGAAAGTGCTTTCAAAAAAGCGCTATCGTGATGAATTGGGTGCGTTCCACTTTGGATTTACGGCGATGAGCCAAATGAGAGAGAAGCGCTTCTGGGAGAAAAGCAAAGCATAAGGGGATATGATATAAGCAATGCTTTGGTGTGTGAAAGATGAGGGGATCATGGGGAGCTTCATCACGCCATTGTTACGCATCCAAACCATACATaaaaaaaaGCCTAGGGGTAGGCTTTTTT
>Bacillus safensis strain U17-1
TGTCGAAGCACATAAATTCTGCGATAATACTTGTATTGAAAGTGCTTTCAAAAAGGCGCTATCAAGGGACAATTGGGTGCGTTTCACTTGGGATTTATGGCAGTGAGCCAAACGAGAGAGAAGCGCTTCTGGGAGAAACGCAAAGCATCATAAGGGGATCTGATATAAGCAATGCTTTGGTGTGTGAAAGATAAGGGGATCATGGGGAGCTTCATCACTCCATTGTAACGCATCCAAACCATACATaaaaaaaaGCCTAGGGGTAGGCTTTTTT
>Bacillus cellulasensis strain NJ-M2
TGTCGAAGCTCGTAAATTCTGCGATAATACTTATTGAAAGTGCTTTCAAAAAGCGCTATCGTGATGAATTGGGTGCGTTCCACTTTGGATTTACGACGATGAGTCAAATGAGAGAGAAGCGCTTCTGGGAGAAAAGCAAAGCATAAGGGGATATGATATAAGCAATGCTTTGGTGTGTGAAAGATGAGGGGATCATGGGGAGCTTCATCACGCCATTGTTACGCATCCAAACCATACATAAAAAAAAGCCTAGGGGTAGGCTTTTTT
>Bacillus cellulasensis strain NJ-V2
TGTCGAAGCTCGTAAATTCTGCGATAATACTTATTGAAAGTGCTTTCAAAAAGCGCTATCGTGATGAATTGGGTGCGTTCCACTTTGGATTTACGACGATGAGTCAAATGAGAGAGAAGCGCTTCTGGGAGAAAAGCAAAGCATAAGGGGATATGATATAAGCAATGCTTTGGTGTGTGAAAGATGAGGGGATCATGGGGAGCTTCATCACGCCATTGTTACGCATCCAAACCATACATAAAAAAAAGCCTAGGGGTAGGCTTTTTT

## Sheet: Fig.S4b
sequence results of DucSΔ8A through cRACE assay
No.	primer
1	M13-47	GTGGCTCGCAGTGATTCGAGCTCGGTACCCGGGGATCCTCTAGAGATTCTTCTCTCTCATTTGGCTCATCGCCGTAAATCCAAAGTGGAACGCACCCAATTCATCAATGGTTTGGATGCGTAACAATGGCGTGATGAAGAATCGTCGACCTGCAGGCATGCAAGCTTGGCGTAATCATGGTCATAGCTGTTTCCTGA
2	M13-47	GTGCTCGCAGTGATTCGAGCTCGGTACCCGGGGATCCTCTAGAGATTCTTCATCACGCCATTGTTACGCATCCAAACCATATGAATTGGGTGCGTTCCACTTTGGATTTACGGCGATGAGCCAAATGAGAGAGAAGCGCTTCTGGGAGAAAAGCAAAGCATAAGGGGATATGATATAAGCAATGCTTTGGTGTGTGAAAGATGAGGGGATCATGGGGAACTTCATCACGCCATTGTTACGCATCCAAACCATGATGAATTGGGTGCGTTCCACTTTGGATTTACGGCGATGAGCCAAATGAGAGAGAAGCGCTTCTGGGAGAAAAGCAAAGCATAAGGGGATATGATATAAGCAATGCTTTGGTGTGTGAAAGATGAGGGGATCATGGGGAGCTTCATC…
3	M13-47	GAGGCTCGCAGTGATTCGAGCTCGGTACCCGGGGATCCTCTAGAGATTAGAGAGAAGCGCTTCTGGGAGAAAAGCAAAGCATAAGGGGATATGATATAAGCAATGCTTTGGTGTGTGAAAGATGAGGGGATCATGGGGAGCTTCATCACGCCATTGTTACACATCCAAACCATGATGAATTGGGTGCGTTCCACTTTGGATTTACGGCGATGAGCCAAATGAGAGAGAGGCGCTTCTGGGAGAAAAGCAAAGCATAAGGGGATATGATATAAGCAATGCTTTGGTGTGTGAAAGATGAGGGGATCATGGGGAGCTTCATCACGCCATTGTTACGCATCCAAACCATTGATGAATTGGGTGCGTTCCACTTTGGATTTACGGCGATGAGCCAAATGAGAG…
4	M13-47	GGGCTCGCAGTGATTCGAGCTCGGTACCCGGGGATCCTCTAGAGATTCTTCATCACGCCATTGTTACGCATCCAAACCATTCGTGATGAATTGGGTGCGTTCCACTTTGGATTTACGGCGATGAGCCAAATGAGAGAGAAGAATCGTCGACCTGCAGGCATGCAAGCTTGGCGTAATCATGGTCAAGCTGTTTCCTGA
sequence results of DucSΔ18through cRACE assay
No.	primer
1	M13-47	GTGCAACGTAGTGATTCGAGCTCGGTACCCGGGGATCCTCTAGAGATTCTTCATCACGCCATTGTTACGCATCCAAACCATATGAATTGGGTGCGTTCCACTTTGGATTTACGGCGATGAGCCAAATGAGAGAGAAGCGCTTCTGGGAGAAAAGCAAAGCATAAGGGGATATGATATAAGCAATGCTTTGGTGTGTGAAAGATGAGGGGATCATGGGGAGCTTCATCACGCCATTGTTACGCATCCAAACCATTGATGAATTGGGTGCGTTCCACTTTGGATTTACGGCGATGAGCCAAATGAGAGAGAAGCGCTTCTGGGAGAAAAGCAAAGCATAAGGGGATATGATATAAGCAATGCTTTGGTGTGTGAAAGATGAGGGGATCATGGGGAGCTTCA…
2	M13-47	GGCATCGCAGTGATTCGAGCTCGGTACCCGGGGATCCTCTAGAGATTCTTCTCTCTCATTTGGCTCATCGCCGTAAATCCAAAGTGGAACGCACCCAATTCATATGGTTTGGATGCGTAACAATGGCGTGATGAAGCTCCCCATGATCCCCTCATCTTTCACACACCAAAGCATTGCTTATATCATATCCCCTTATGCTTTGCTTTTCTCCCAGAAGCGCTTCTCTCTCATTTGGCTCATCGCCGTAAATCCAAAGTGGAACGCACCCAATTCATATGGTTTGGATGAATCGTCGACCTGCAGGCATGCAAGCTTGGCGTAATCATGGTCATACTGATTTCCTGATA
3	M13-47	GGCATCGCAGTGATTCGAGCTCGGTACCCGGGGATCCTCTAGAGATCTTCTCTCTCATTTGGCTCATCGCCGTAAATCCAAAGTGGAACGCACCCAATTCATCATGGTTTGGATGCGTAACAATGGCGTGATGAAGAATCGTCGACCTGCAGGCATGCAAGCTTGGCGTAATCATGGTCATAGCTGTTTCCTGA
4	M13-47	TGGCTCGTAGTGATTCGAGCTCGGTACCCGGGGATCCTCTAGAGATTCCATTGTTACGCATCCAAACCATTCGCTATCGTGATGAATTGGGTGCGTTCCACTTTGGATTTACGGCGATGAGCCAAATGAGAGAGAAGCGCTTCTGGGAGAAAAGCAAAGCATAAGGGGATATGATATAAGCAATGCTTTGGTGTGTGAAAGATGAGGGGATCATGGGGAGCTTCATCACGCCATTGTTACGCATCCAAACCATTGATGAATTGGGTGCGTTCCACTTTGGATTTACGGCGATGAGCCAAATGAGAGAGAAGCGCTTCTGGGAGAAAAGCAAAGCATAAGGGGATATGATATAAGCAATGCTTTGGTGTGTGAAAGATGAGGGGATCATGGGGAGCTTCA…

## Sheet: Fig.S6
Independent experiments n=3
Graphs plotted in GraphPad Prism 8.3 software
Statistical significance was calculated with a two-tailed unpaired t-test using GraphPad Prism 8.3 software and p value are indicated.
	pHtrA::sfGFP	pDucS-HtrA::sfGFP
Exp.1	1	1.10957
Exp.2	1	1.07923
Exp.3	1	1.30134
Mean	1	1.16338
SD	0	0.120438

[truncated: 6 more sheets: Fig.S7, Fig.S8b, Fig.S8c, Fig.S9a, Fig.S9b, Fig.S10]
